# Supplementary material for: Diversity of Methicillin-Resistant Staphylococcus aureus Strains Isolated from Residents of 26 Nursing Homes in Orange County, California
Source: PubMed Central journal article supplement (PMC3889768; doi:10.1128/jcm.01708-13), 2013-11
Supplement: JCM.01708-13_zjm999092928so1.pdf [file JCM.01708-13_zjm999092928so1.pdf]

Table S1. *spa* type frequencies by nursing home for the 835 carriage MRSA isolates collected from 25 nursing homes in Orange County, California.

| Nursing Home | <i>spa</i> type | Frequency | %     |
|--------------|-----------------|-----------|-------|
| 1            | t002            | 30        | 36.6  |
|              | t008            | 29        | 35.4  |
|              | t242            | 16        | 19.5  |
|              | t018            | 2         | 2.4   |
|              | t037            | 1         | 1.2   |
|              | t2031           | 1         | 1.2   |
|              | t437            | 1         | 1.2   |
|              | t4963           | 1         | 1.2   |
|              | t895            | 1         | 1.2   |
|              | Total           | 82        | 100.0 |
| 2            | t242            | 8         | 44.4  |
|              | t002            | 5         | 27.8  |
|              | t008            | 1         | 5.6   |
|              | t189            | 1         | 5.6   |
|              | t2049           | 1         | 5.6   |
|              | t548            | 1         | 5.6   |
|              | NT              | 1         | 5.6   |
|              | Total           | 18        | 100.0 |
| 3            | t008            | 14        | 35.9  |
|              | t002            | 12        | 30.8  |
|              | t242            | 9         | 23.1  |
|              | t189            | 2         | 5.1   |
|              | t067            | 1         | 2.6   |
|              | t400            | 1         | 2.6   |
|              | Total           | 39        | 100.0 |

---

|   |       |    |       |
|---|-------|----|-------|
| 4 | t002  | 7  | 70.0  |
|   | t008  | 1  | 10.0  |
|   | t1610 | 1  | 10.0  |
|   | t242  | 1  | 10.0  |
|   | Total | 10 | 100.0 |
| 5 | t242  | 10 | 35.7  |
|   | t008  | 9  | 32.1  |
|   | t002  | 8  | 28.6  |
|   | t1341 | 1  | 3.6   |
|   | Total | 28 | 100.0 |
| 6 | t002  | 18 | 40.0  |
|   | t008  | 15 | 33.3  |
|   | t242  | 10 | 22.2  |
|   | t1610 | 1  | 2.2   |
|   | t8606 | 1  | 2.2   |
|   | Total | 45 | 100.0 |
| 7 | t242  | 13 | 38.2  |
|   | t002  | 8  | 23.5  |
|   | t008  | 7  | 20.6  |
|   | t8750 | 2  | 5.9   |
|   | t037  | 1  | 2.9   |
|   | t088  | 1  | 2.9   |
|   | t1341 | 1  | 2.9   |
|   | t211  | 1  | 2.9   |
|   | Total | 34 | 100.0 |
| 8 | t242  | 6  | 50.0  |
|   | t008  | 4  | 33.3  |
|   | t1341 | 1  | 8.3   |
|   | t736  | 1  | 8.3   |

---

---

|    |       |    |       |
|----|-------|----|-------|
|    | Total | 12 | 100.0 |
| 9  | t242  | 19 | 35.9  |
|    | t306  | 8  | 15.1  |
|    | t008  | 7  | 13.2  |
|    | t068  | 6  | 11.3  |
|    | t002  | 4  | 7.6   |
|    | t8748 | 2  | 3.8   |
|    | t024  | 1  | 1.9   |
|    | t026  | 1  | 1.9   |
|    | t127  | 1  | 1.9   |
|    | t189  | 1  | 1.9   |
|    | t548  | 1  | 1.9   |
|    | t6065 | 1  | 1.9   |
|    | t723  | 1  | 1.9   |
|    | Total | 53 | 100.0 |
| 10 | t242  | 17 | 50.0  |
|    | t008  | 12 | 35.3  |
|    | t002  | 3  | 8.8   |
|    | t045  | 1  | 2.9   |
|    | t2115 | 1  | 2.9   |
|    | Total | 34 | 100.0 |
| 11 | t008  | 33 | 45.2  |
|    | t002  | 13 | 17.8  |
|    | t242  | 13 | 17.8  |
|    | t088  | 5  | 6.9   |
|    | t037  | 2  | 2.7   |
|    | t306  | 2  | 2.7   |
|    | t539  | 2  | 2.7   |
|    | t010  | 1  | 1.4   |
|    | t024  | 1  | 1.4   |

---

---

|    |       |    |       |
|----|-------|----|-------|
|    | t105  | 1  | 1.4   |
|    | Total | 73 | 100.0 |
| 12 | t242  | 19 | 50.0  |
|    | t002  | 9  | 23.7  |
|    | t1774 | 5  | 13.2  |
|    | t008  | 1  | 2.6   |
|    | t121  | 1  | 2.6   |
|    | t306  | 1  | 2.6   |
|    | t8747 | 1  | 2.6   |
|    | t8865 | 1  | 2.6   |
|    | Total | 38 | 100.0 |
| 13 | t242  | 20 | 52.6  |
|    | t002  | 9  | 23.7  |
|    | t008  | 7  | 18.4  |
|    | t548  | 1  | 2.6   |
|    | t8749 | 1  | 2.6   |
|    | Total | 38 | 100.0 |
| 14 | t002  | 12 | 54.6  |
|    | t008  | 5  | 22.7  |
|    | t010  | 4  | 18.2  |
|    | t242  | 1  | 4.6   |
|    | Total | 22 | 100.0 |
| 15 | t002  | 3  | 75.0  |
|    | t1932 | 1  | 25.0  |
|    | Total | 4  | 100.0 |
| 16 | t242  | 19 | 51.4  |
|    | t008  | 7  | 18.9  |
|    | t002  | 3  | 8.1   |

---

---

|    |       |    |       |
|----|-------|----|-------|
|    | t5916 | 3  | 8.1   |
|    | t071  | 2  | 5.4   |
|    | t032  | 1  | 2.7   |
|    | t509  | 1  | 2.7   |
|    | t579  | 1  | 2.7   |
|    | Total | 37 | 100.0 |
| 17 | t242  | 15 | 62.5  |
|    | t002  | 3  | 12.5  |
|    | t024  | 3  | 12.5  |
|    | t8086 | 2  | 8.3   |
|    | t127  | 1  | 4.2   |
|    | Total | 24 | 100.0 |
| 18 | t008  | 1  | 100.0 |
|    | Total | 1  | 100.0 |
| 19 | t008  | 8  | 72.7  |
|    | t002  | 2  | 18.2  |
|    | t242  | 1  | 9.1   |
|    | Total | 11 | 100.0 |
| 20 | t008  | 24 | 38.7  |
|    | t002  | 19 | 30.7  |
|    | t242  | 13 | 21.0  |
|    | t127  | 2  | 3.2   |
|    | t037  | 1  | 1.6   |
|    | t040  | 1  | 1.6   |
|    | t1080 | 1  | 1.6   |
|    | t1220 | 1  | 1.6   |
|    | Total | 62 | 100.0 |
| 21 | t242  | 30 | 46.9  |

---

|    |       |    |       |
|----|-------|----|-------|
|    | t002  | 12 | 18.8  |
|    | t008  | 9  | 14.1  |
|    | t127  | 7  | 10.9  |
|    | t088  | 2  | 3.1   |
|    | t045  | 1  | 1.6   |
|    | t2879 | 1  | 1.6   |
|    | t509  | 1  | 1.6   |
|    | t581  | 1  | 1.6   |
|    | Total | 64 | 100.0 |
| 22 | t002  | 2  | 25.0  |
|    | t008  | 2  | 25.0  |
|    | t242  | 2  | 25.0  |
|    | t548  | 1  | 12.5  |
|    | t8444 | 1  | 12.5  |
|    | Total | 8  | 100.0 |
| 23 | t008  | 13 | 29.6  |
|    | t002  | 7  | 15.9  |
|    | t1186 | 5  | 11.4  |
|    | t242  | 4  | 9.1   |
|    | t4462 | 4  | 9.1   |
|    | t037  | 2  | 4.6   |
|    | t548  | 2  | 4.6   |
|    | t5916 | 2  | 4.6   |
|    | t064  | 1  | 2.3   |
|    | t088  | 1  | 2.3   |
|    | t2229 | 1  | 2.3   |
|    | t8443 | 1  | 2.3   |
|    | Total | 43 | 100.0 |
| 24 | t242  | 27 | 51.9  |
|    | t008  | 9  | 17.3  |

|    |       |    |       |
|----|-------|----|-------|
|    | t002  | 6  | 11.5  |
|    | t045  | 2  | 3.9   |
|    | t018  | 1  | 1.9   |
|    | t024  | 1  | 1.9   |
|    | t088  | 1  | 1.9   |
|    | t127  | 1  | 1.9   |
|    | t1737 | 1  | 1.9   |
|    | t400  | 1  | 1.9   |
|    | t7275 | 1  | 1.9   |
|    | Total | 51 | 100.0 |
| 25 | t008  | 4  | 100.0 |
|    | Total | 4  | 100.0 |
